# Supplementary material for: Nutritional Properties of Baobab Pulp from Different Angolan Origins
Source: MDPI journal article supplement (doi:10.3390/plants11172272), 2022-08-31
Supplement: s1 [file s1]

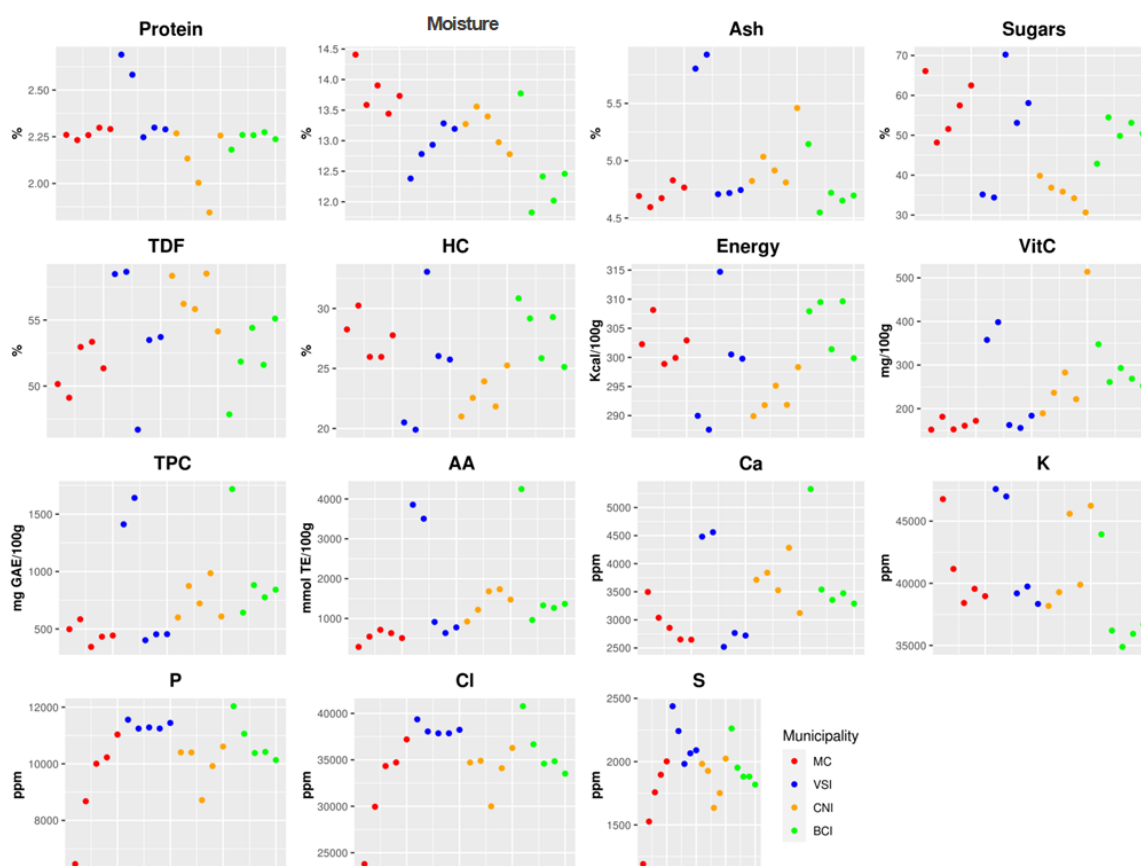

**Figure S1.** - Global distribution of the different baoba's constituents across the four Namibe municipalities.

**Table S1.** P-values obtained from the Shapiro-Wilks normality tests for each of the constituents' levels within each municipality. Grey cells indicate those tests that failed at the 5% significance level.

| Constituent/Municipality | BCI    | CNI     | MC     | VSI    |
|--------------------------|--------|---------|--------|--------|
| Moisture (%)             | 0.1847 | 0.8075  | 0.5690 | 0.7083 |
| Ash (%)                  | 0.1009 | 0.1020  | 0.9502 | 0.0196 |
| Protein(%)               | 0.1860 | 0.4924  | 0.5881 | 0.1353 |
| TDF (%)                  | 0.5598 | 0.4989  | 0.6465 | 0.3080 |
| HC (%)                   | 0.3779 | 0.8669  | 0.4265 | 0.4161 |
| Energy (kcal/100g)       | 0.1095 | 0.5403  | 0.4909 | 0.5258 |
| Ca (ppm)                 | 0.0035 | 0.9853  | 0.2840 | 0.0399 |
| K (ppm)                  | 0.0167 | 0.1332  | 0.0812 | 0.0642 |
| P (ppm)                  | 0.2484 | 0.0892  | 0.4663 | 0.1697 |
| Cl (ppm)                 | 0.2571 | 0.1829  | 0.4581 | 0.0324 |
| S (ppm)                  | 0.0635 | 0.45990 | 0.6782 | 0.5471 |
| TPC (mg GAE/100g)        | 0.0312 | 0.4192  | 0.9409 | 0.0416 |
| AA (mmol TE/100g)        | 0.0035 | 0.5793  | 0.7365 | 0.0416 |
| Vitamin C (mg/100g)      | 0.2185 | 0.0587  | 0.4341 | 0.0758 |

**Table S2.** P-values obtained from the Bartlett and Levene tests of variance homogeneity for each of the constituents' levels across the 4 municipalities. Grey cells indicate those tests that failed at the 5% significance level.

|                     | p-value |
|---------------------|---------|
| Moisture (%)        | 0.2608  |
| Ash (%)             | 0.2915  |
| Protein (%)         | 0.0009  |
| TDF (%)             | 0.1665  |
| HC (%)              | 0.0767  |
| Energy (kcal/100g)  | 0.0665  |
| Ca (ppm)            | 0.5799  |
| K (ppm)             | 0.3012  |
| P (ppm)             | 0.0016  |
| Cl (ppm)            | 0.8841  |
| S (ppm)             | 0.4745  |
| TPC (mg GAE/100g)   | 0.3704  |
| AA (mmol TE/100g)   | 0.3219  |
| Vitamin C (mg/100g) | 0.0013  |

**Table S3.** Results from the pairwise comparison of means across the 4 municipalities for the constituents for which the existence of at least one pairwise significant difference was detected by the F-ANOVA, F-Welch-ANOVA and Kruskal Wallis tests. Significant differences are marked with X.

|                     | Paired municipalities |         |         |        |        |        |
|---------------------|-----------------------|---------|---------|--------|--------|--------|
|                     | VSI-BCI               | CNI-BCI | CNI-VSI | MC-VSI | MC-CNI | MC-BCI |
| Moisture (%)        |                       |         |         | X      |        | X      |
| Energy (kcal/100g)  |                       | X       |         |        |        |        |
| S (ppm)             |                       |         |         | X      |        |        |
| TPC (mg GAE/100g)   |                       |         |         |        |        | X      |
| AA (mmol TE/100g)   |                       |         |         |        | X      | X      |
| Vitamin C (mg/100g) |                       |         |         |        |        | X      |
